# Supplementary material
Source: Elsevier journal article supplement (https://www.sciencedirect.com/science/article/pii/S2530064421000754)
Supplement: mmc1 [file S2530064421000754:mmc1.docx]

**Table S1.** List of marine mammal species in this study. “Status” represents the IUCN listing, as follows: CR = Critically Endangered; EN = Endangered; VU = Vulnerable; NT = Near Threatened; DD = Data Deficient; and LC = Least Concern. “Groups” represent the different groups under which analyses were performed for each species, as follows: FA = Fully-aquatic; NFA = Non-fully aquatic; MI = Migratory species; NMI = Non-migratory species; UNK = Unknown migratory status; NTR = Non-threatened (listed as LC); and TR = Threatened (includes CR, EN, VU, NT, and DD). Nomad species (NOM) were included in analyses for all species combined (group All), and under FA/NFA and TR/NTR groups.

|  |  |  |  |  |  |  |  |  |  |  |
| --- | --- | --- | --- | --- | --- | --- | --- | --- | --- | --- |
| **Species** | **Status** | **Groups** | | |  | **Species** | **Status** | **Groups** | | |
| *Arctocephalus australis* | LC | NFA | NMI | NTR |  | *Mesoplodon bowdoini* | DD | FA | UNK | TR |
| *Arctocephalus forsteri* | LC | NFA | NMI | NTR |  | *Mesoplodon carlhubbsi* | DD | FA | UNK | TR |
| *Arctocephalus galapagoensis* | EN | NFA | NMI | TR |  | *Mesoplodon densirostris* | LC | FA | NMI | NTR |
| *Arctocephalus gazella* | LC | NFA | NMI | NTR |  | *Mesoplodon europaeus* | LC | FA | NMI | NTR |
| *Arctocephalus philippii* | LC | NFA | NMI | NTR |  | *Mesoplodon ginkgodens* | DD | FA | UNK | TR |
| *Arctocephalus pusillus* | LC | NFA | NMI | NTR |  | *Mesoplodon grayi* | LC | FA | UNK | NTR |
| *Arctocephalus townsendi* | LC | NFA | NMI | NTR |  | *Mesoplodon hectori* | DD | FA | UNK | TR |
| *Arctocephalus tropicalis* | LC | NFA | NMI | NTR |  | *Mesoplodon layardii* | LC | FA | MI | NTR |
| *Balaena mysticetus* | LC | FA | MI | NTR |  | *Mesoplodon mirus* | LC | FA | UNK | NTR |
| *Balaenoptera acutorostrata* | LC | FA | MI | NTR |  | *Mesoplodon perrini* | EN | FA | UNK | TR |
| *Balaenoptera bonaerensis* | NT | FA | MI | TR |  | *Mesoplodon peruvianus* | LC | FA | UNK | NTR |
| *Balaenoptera borealis* | EN | FA | MI | TR |  | *Mesoplodon stejnegeri* | NT | FA | MI | TR |
| *Balaenoptera edeni* | LC | FA | MI | NTR |  | *Mesoplodon traversii* | DD | FA | UNK | TR |
| *Balaenoptera musculus* | EN | FA | MI | TR |  | *Mirounga angustirostris* | LC | NFA | NMI | NTR |
| *Balaenoptera omurai* | DD | FA | UNK | TR |  | *Mirounga leonina* | LC | NFA | MI | NTR |
| *Balaenoptera physalus* | VU | FA | MI | TR |  | *Monachus monachus* | EN | NFA | NMI | TR |
| *Berardius arnuxii* | LC | FA | NMI | NTR |  | *Monodon monoceros* | LC | FA | MI | NTR |
| *Berardius bairdii* | LC | FA | MI | NTR |  | *Neomonachus schauinslandi* | EN | NFA | NMI | TR |
| *Callorhinus ursinus* | VU | NFA | NMI | TR |  | *Neophoca cinerea* | EN | NFA | NMI | TR |
| *Caperea marginata* | LC | FA | UNK | NTR |  | *Neophocaena asiaeorientalis* | EN | FA | NMI | TR |
| *Cephalorhynchus commersonii* | LC | FA | UNK | NTR |  | *Neophocaena phocaenoides* | VU | FA | NMI | TR |
| *Cephalorhynchus eutropia* | NT | FA | NMI | TR |  | *Odobenus rosmarus* | VU | NFA | MI | TR |
| *Cephalorhynchus heavisidii* | NT | FA | UNK | TR |  | *Ommatophoca rossii* | LC | NFA | NMI | NTR |
| *Cephalorhynchus hectori* | EN | FA | MI | TR |  | *Orcaella brevirostris* | EN | FA | NMI | TR |
| *Cystophora cristata* | VU | NFA | NMI | TR |  | *Orcaella heinsohni* | VU | FA | NMI | TR |
| *Delphinapterus leucas* | LC | FA | MI | NTR |  | *Orcinus orca* | DD | FA | MI | TR |
| *Delphinus capensis* | DD | FA | MI | TR |  | *Otaria byronia* | LC | NFA | NMI | NTR |
| *Delphinus delphis* | LC | FA | NMI | NTR |  | *Pagophilus groenlandicus* | LC | NFA | NMI | NTR |
| *Dugong dugon* | VU | FA | NOM | TR |  | *Peponocephala electra* | LC | FA | NMI | NTR |
| *Enhydra lutris* | EN | NFA | NMI | TR |  | *Phoca largha* | LC | NFA | MI | NTR |
| *Erignathus barbatus* | LC | NFA | NMI | NTR |  | *Phoca vitulina* | LC | NFA | NMI | NTR |
| *Eschrichtius robustus* | LC | FA | MI | NTR |  | *Phocarctos hookeri* | EN | NFA | NMI | TR |
| *Eubalaena australis* | LC | FA | MI | NTR |  | *Phocoena dioptrica* | LC | FA | NMI | NTR |
| *Eubalaena glacialis* | CR | FA | MI | TR |  | *Phocoena phocoena* | LC | FA | NOM | NTR |
| *Eubalaena japonica* | EN | FA | MI | TR |  | *Phocoena sinus* | CR | FA | NMI | TR |
| *Eumetopias jubatus* | NT | NFA | NMI | TR |  | *Phocoena spinipinnis* | NT | FA | UNK | NTR |
| *Feresa attenuata* | LC | FA | MI | NTR |  | *Phocoenoides dalli* | LC | FA | UNK | NTR |
| *Globicephala macrorhynchus* | LC | FA | NOM | NTR |  | *Physeter macrocephalus* | VU | FA | MI | TR |
| *Globicephala melas* | LC | FA | MI | NTR |  | *Pontoporia blainvillei* | VU | FA | NMI | TR |
| *Grampus griseus* | LC | FA | UNK | NTR |  | *Pseudorca crassidens* | NT | FA | UNK | TR |
| *Halichoerus grypus* | LC | NFA | NMI | NTR |  | *Pusa caspica* | EN | NFA | NMI | TR |
| *Histriophoca fasciata* | LC | NFA | NMI | NTR |  | *Pusa hispida* | LC | NFA | NMI | NTR |
| *Hydrurga leptonyx* | LC | NFA | NMI | NTR |  | *Sotalia guianensis* | NT | FA | UNK | TR |
| *Hyperoodon ampullatus* | DD | FA | NMI | TR |  | *Sousa chinensis* | VU | FA | MI | TR |
| *Hyperoodon planifrons* | LC | FA | MI | NTR |  | *Sousa plumbea* | EN | FA | MI | TR |
| *Indopacetus pacificus* | LC | FA | UNK | NTR |  | *Sousa teuszii* | CR | FA | NMI | TR |
| *Kogia breviceps* | LC | FA | UNK | NTR |  | *Stenella attenuata* | LC | FA | NOM | NTR |
| *Kogia sima* | LC | FA | UNK | NTR |  | *Stenella clymene* | LC | FA | UNK | NTR |
| *Lagenodelphis hosei* | LC | FA | UNK | NTR |  | *Stenella coeruleoalba* | LC | FA | UNK | NTR |
| *Lagenorhynchus acutus* | LC | FA | NMI | NTR |  | *Stenella frontalis* | LC | FA | NMI | NTR |
| *Lagenorhynchus albirostris* | LC | FA | NMI | NTR |  | *Stenella longirostris* | LC | FA | UNK | NTR |
| *Lagenorhynchus australis* | LC | FA | NMI | NTR |  | *Steno bredanensis* | LC | FA | UNK | NTR |
| *Lagenorhynchus cruciger* | LC | FA | MI | NTR |  | *Tasmacetus shepherdi* | DD | FA | UNK | TR |
| *Lagenorhynchus obliquidens* | LC | FA | MI | NTR |  | *Trichechus manatus* | VU | FA | MI | TR |
| *Lagenorhynchus obscurus* | LC | FA | NMI | NTR |  | *Trichechus senegalensis* | VU | FA | MI | TR |
| *Leptonychotes weddellii* | LC | NFA | NMI | NTR |  | *Tursiops aduncus* | NT | FA | UNK | TR |
| *Lissodelphis borealis* | LC | FA | MI | NTR |  | *Tursiops truncatus* | LC | FA | MI | NTR |
| *Lissodelphis peronii* | LC | FA | MI | NTR |  | *Ursus maritimus* | VU | NFA | NOM | TR |
| *Lobodon carcinophaga* | LC | NFA | NMI | NTR |  | *Zalophus californianus* | LC | NFA | NMI | NTR |
| *Lontra felina* | EN | NFA | NMI | TR |  | *Zalophus wollebaeki* | EN | NFA | NMI | TR |
| *Megaptera novaeangliae* | LC | FA | MI | NTR |  | *Ziphius cavirostris* | LC | FA | UNK | NTR |
| *Mesoplodon bidens* | LC | FA | MI | NTR |  |  |  |  |  |  |
|  |  |  |  |  |  |  |  |  |  |  |
